# Supplementary figures and images for: Efficient synthesis of tetrahydronaphthalene- or isochroman-fused spirooxindoles using tandem reactions
Source: Royal Society of Chemistry journal article supplement (doi:10.1039/c5ra15735h), 2015-01-01

Fig. 1

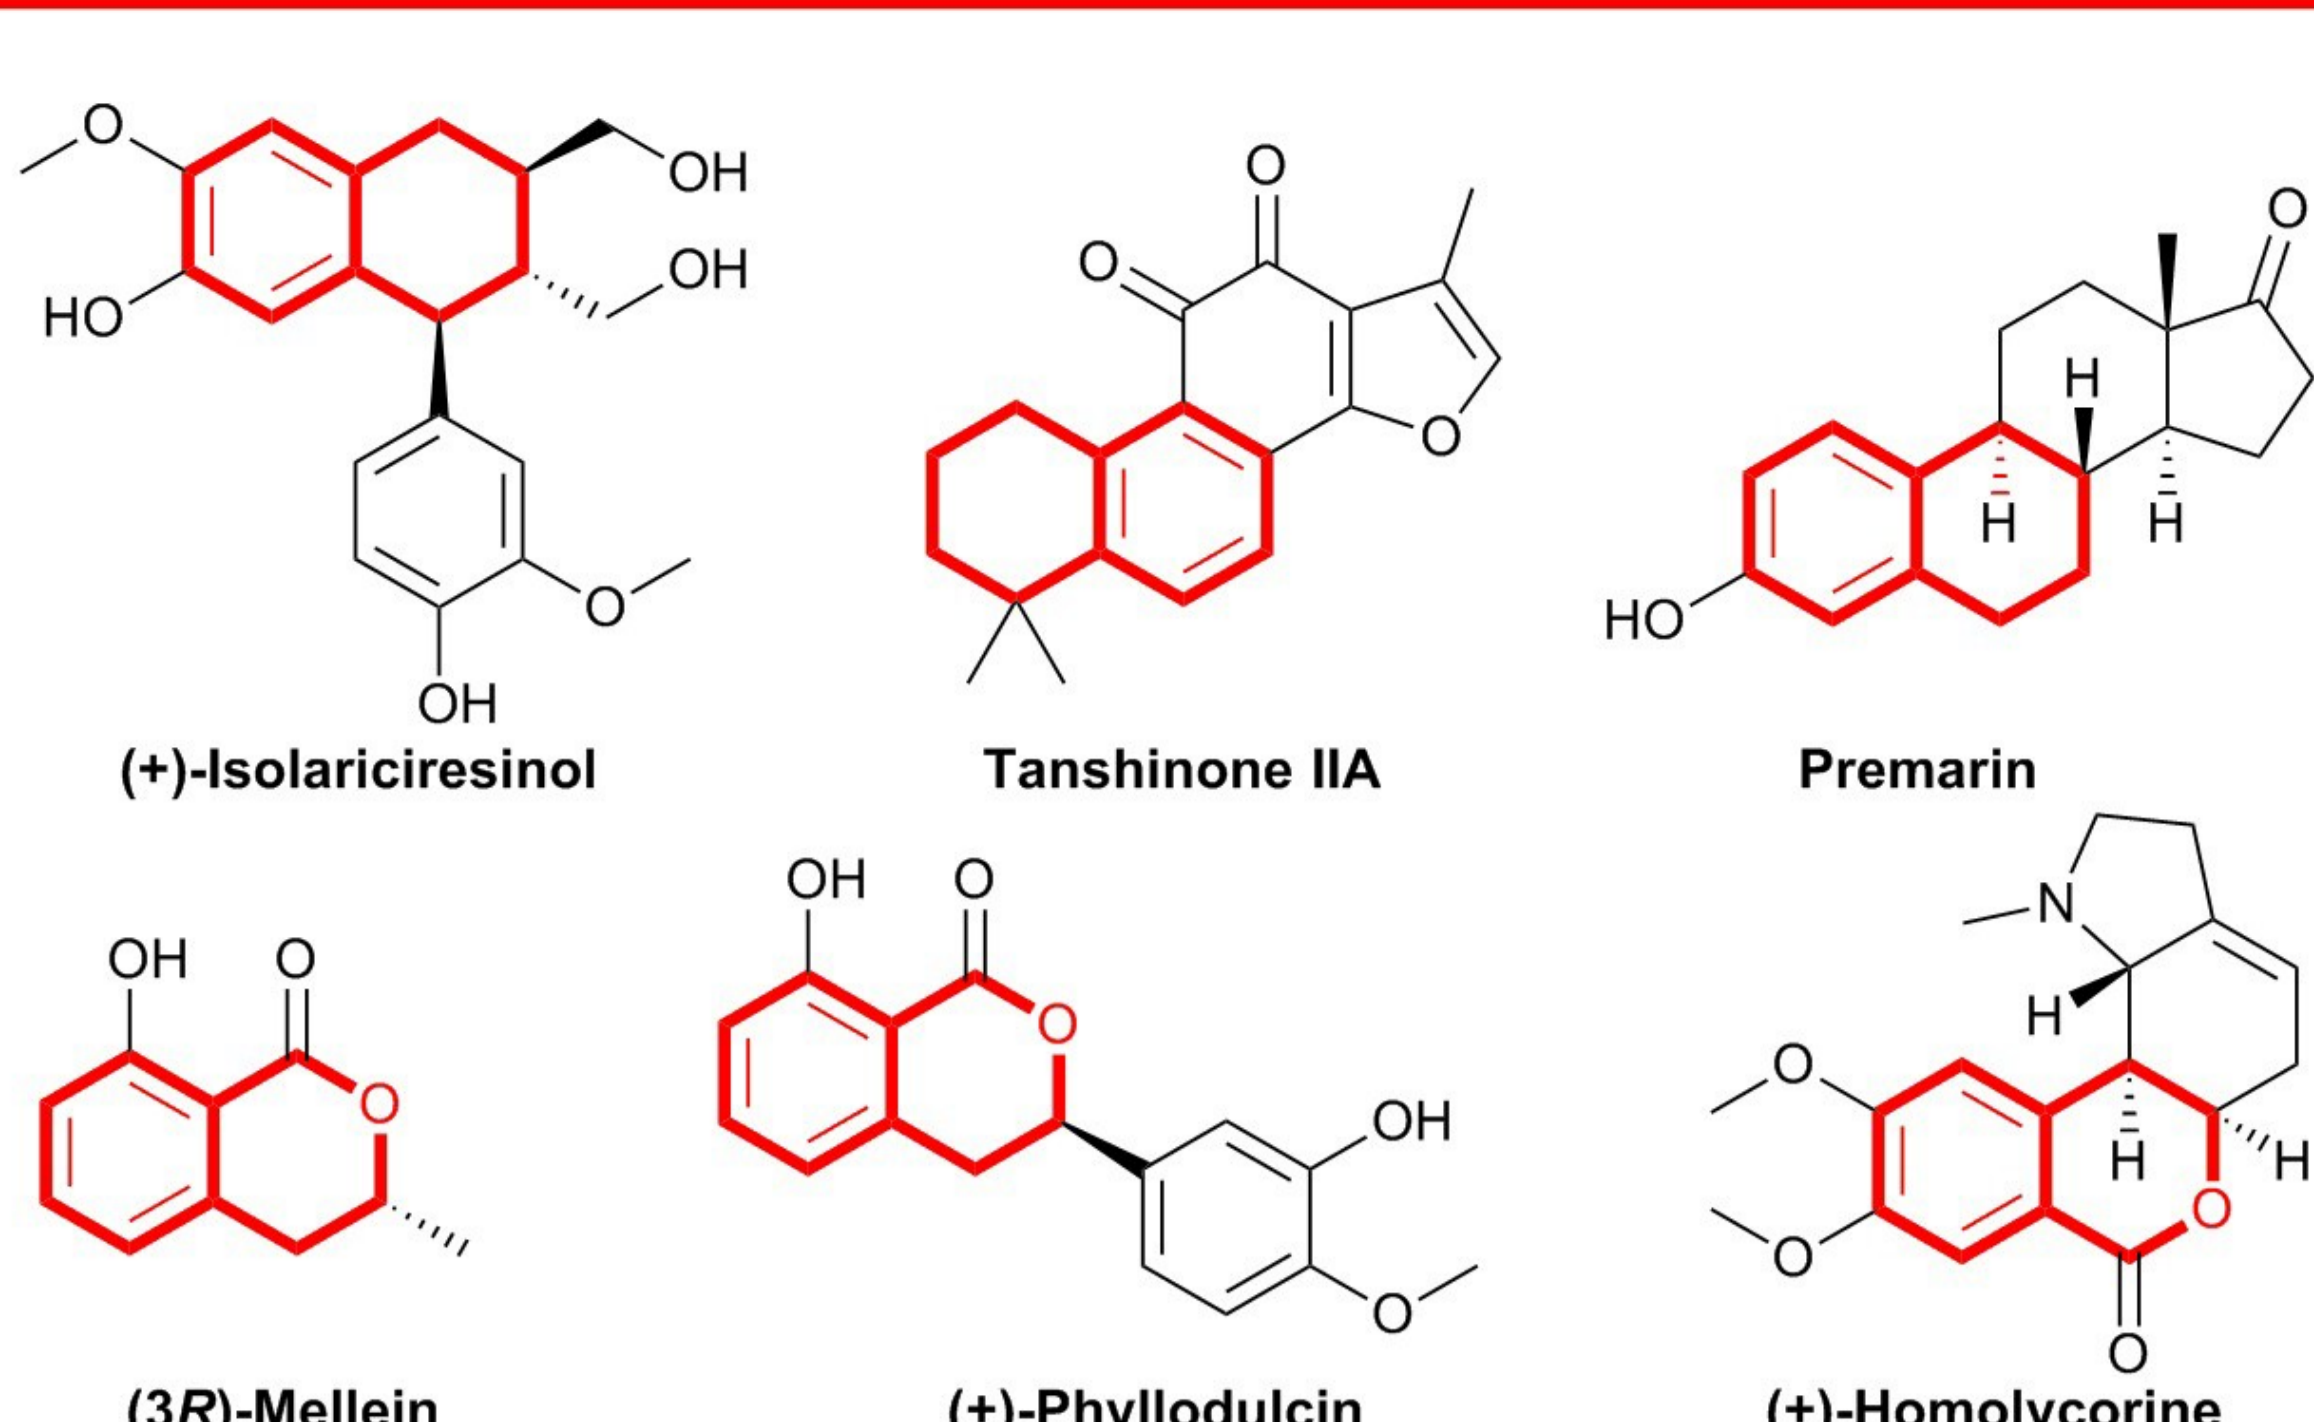

Fig. 2

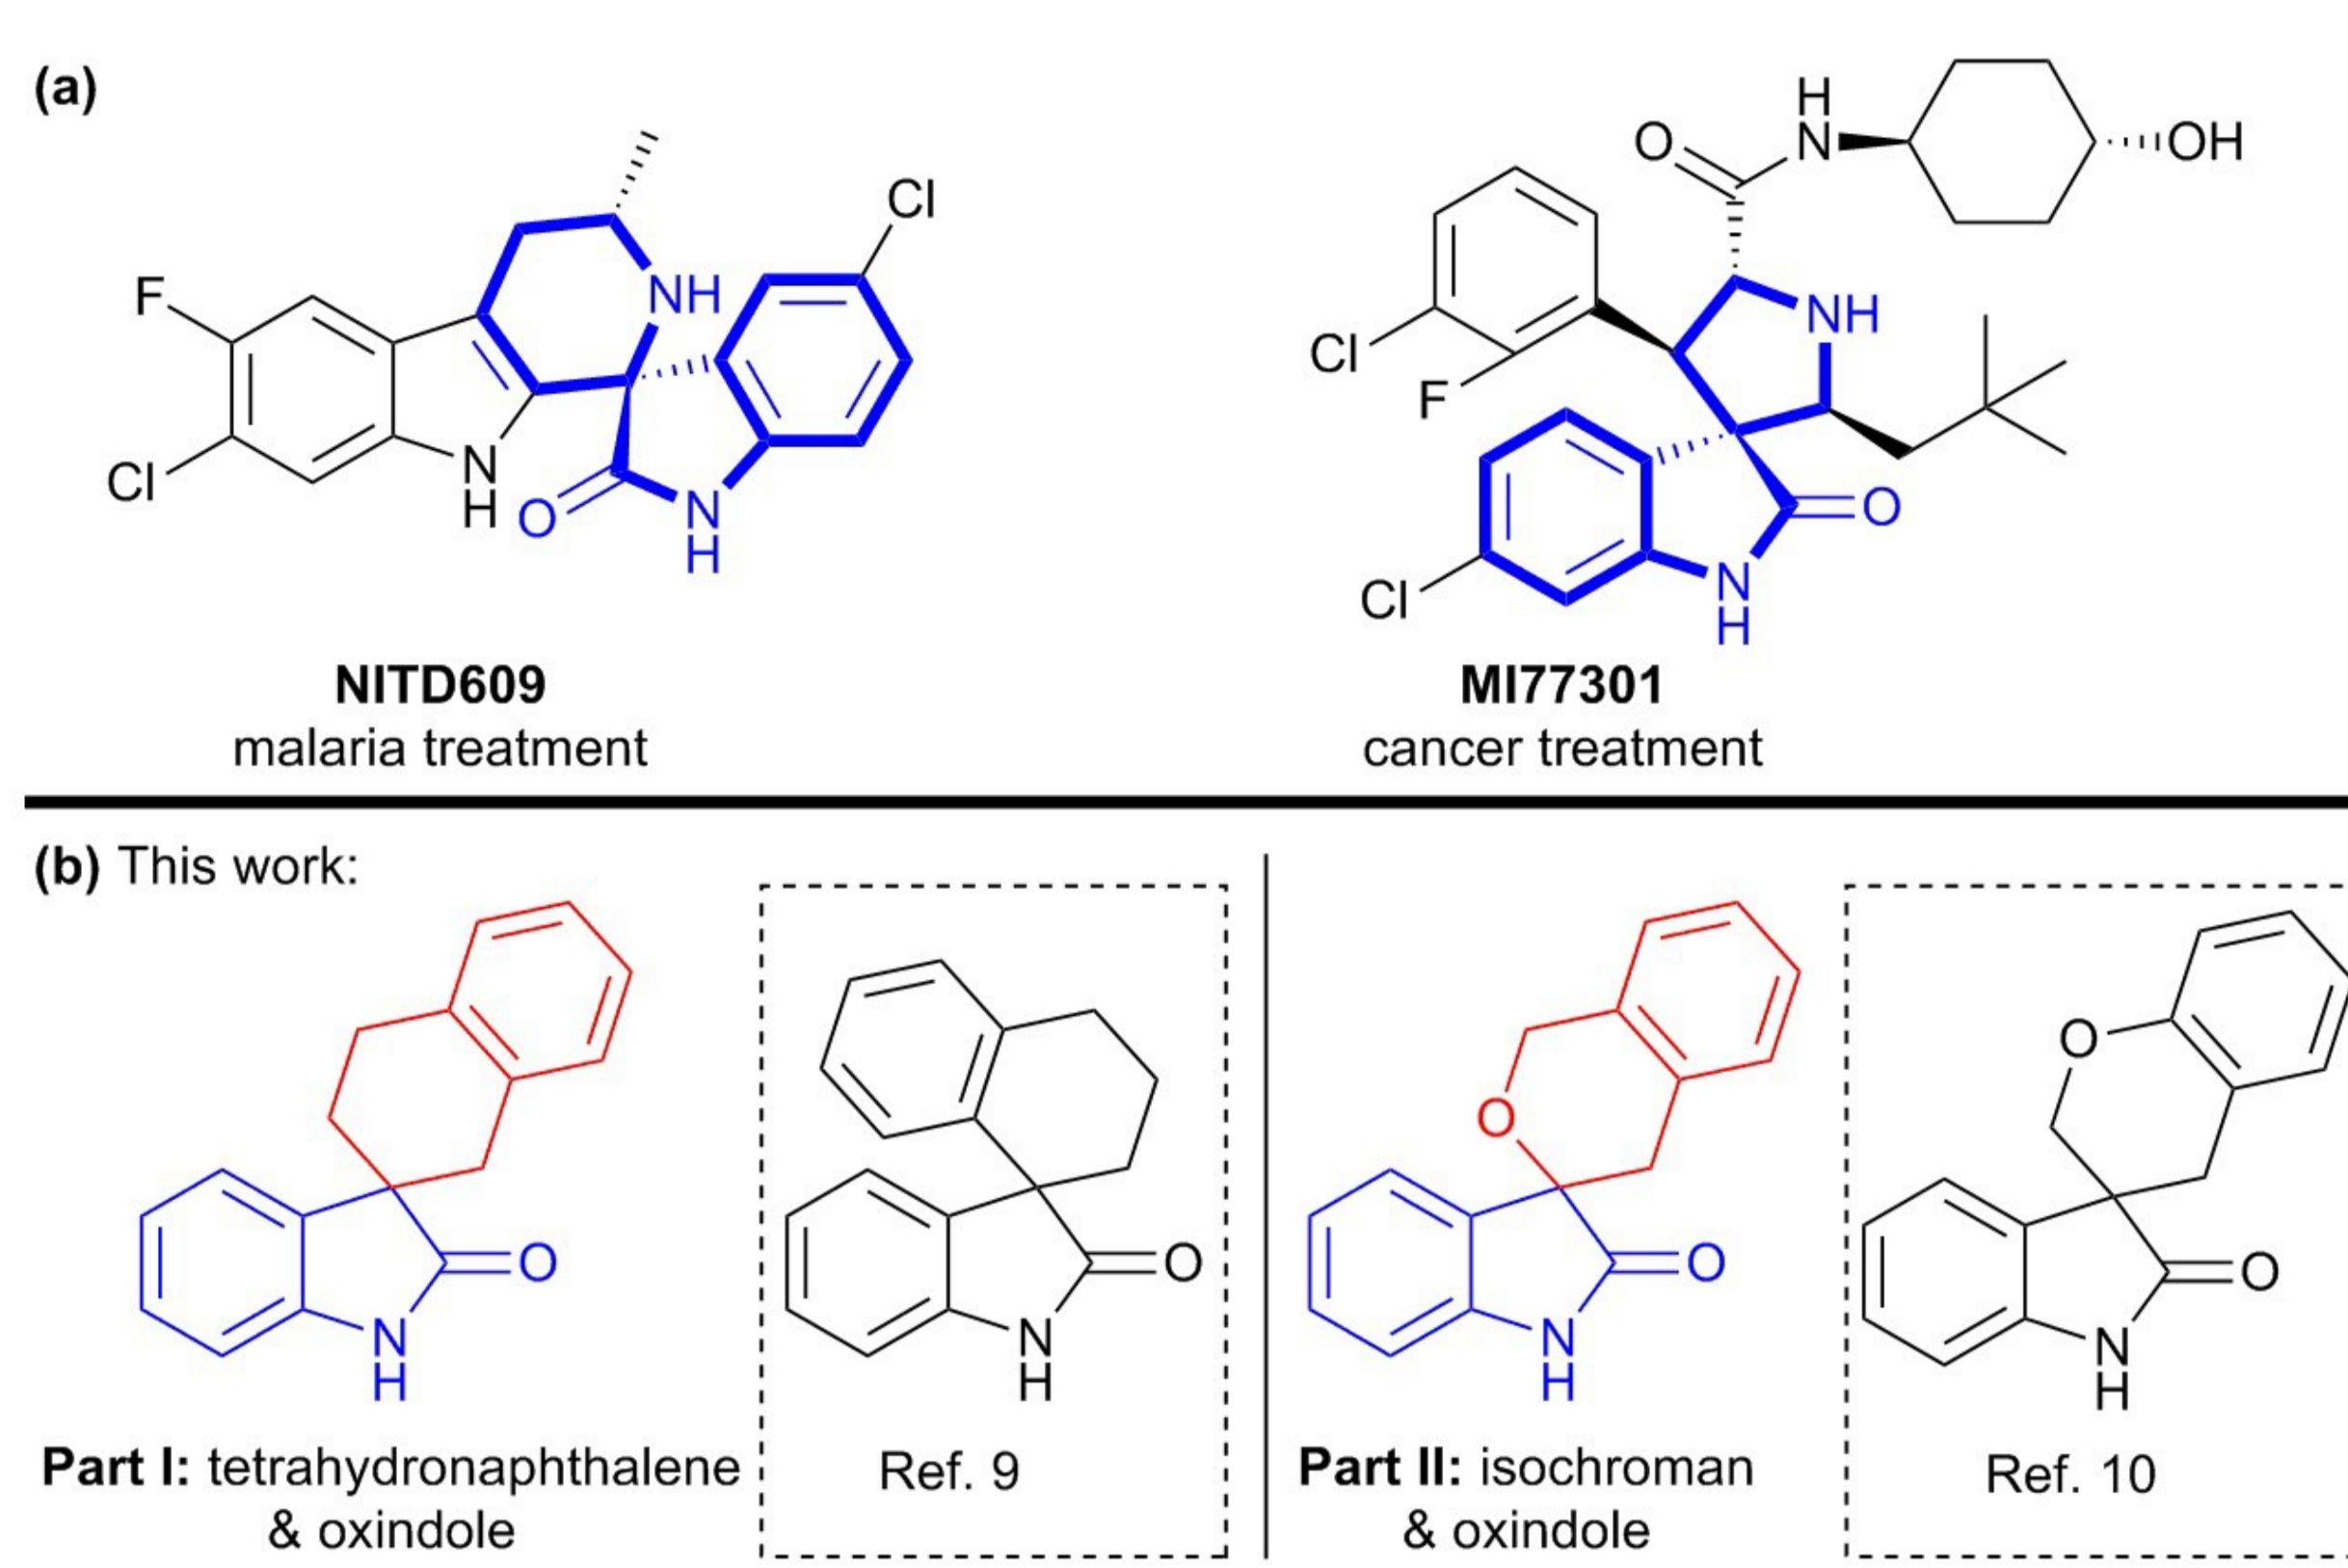

Scheme 1

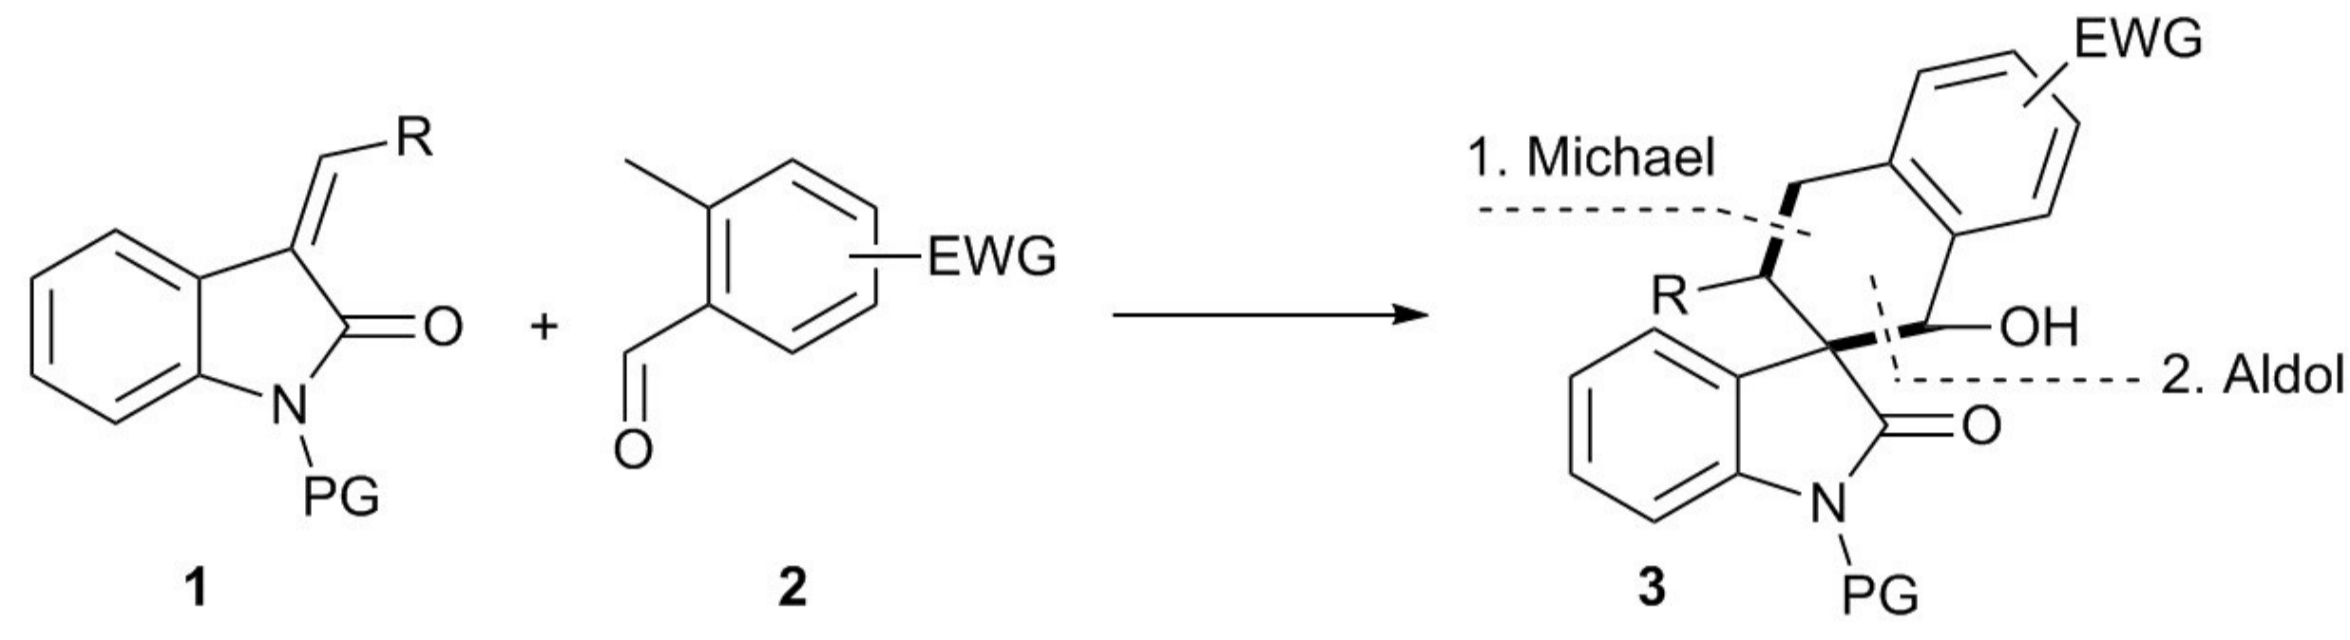

Table 1

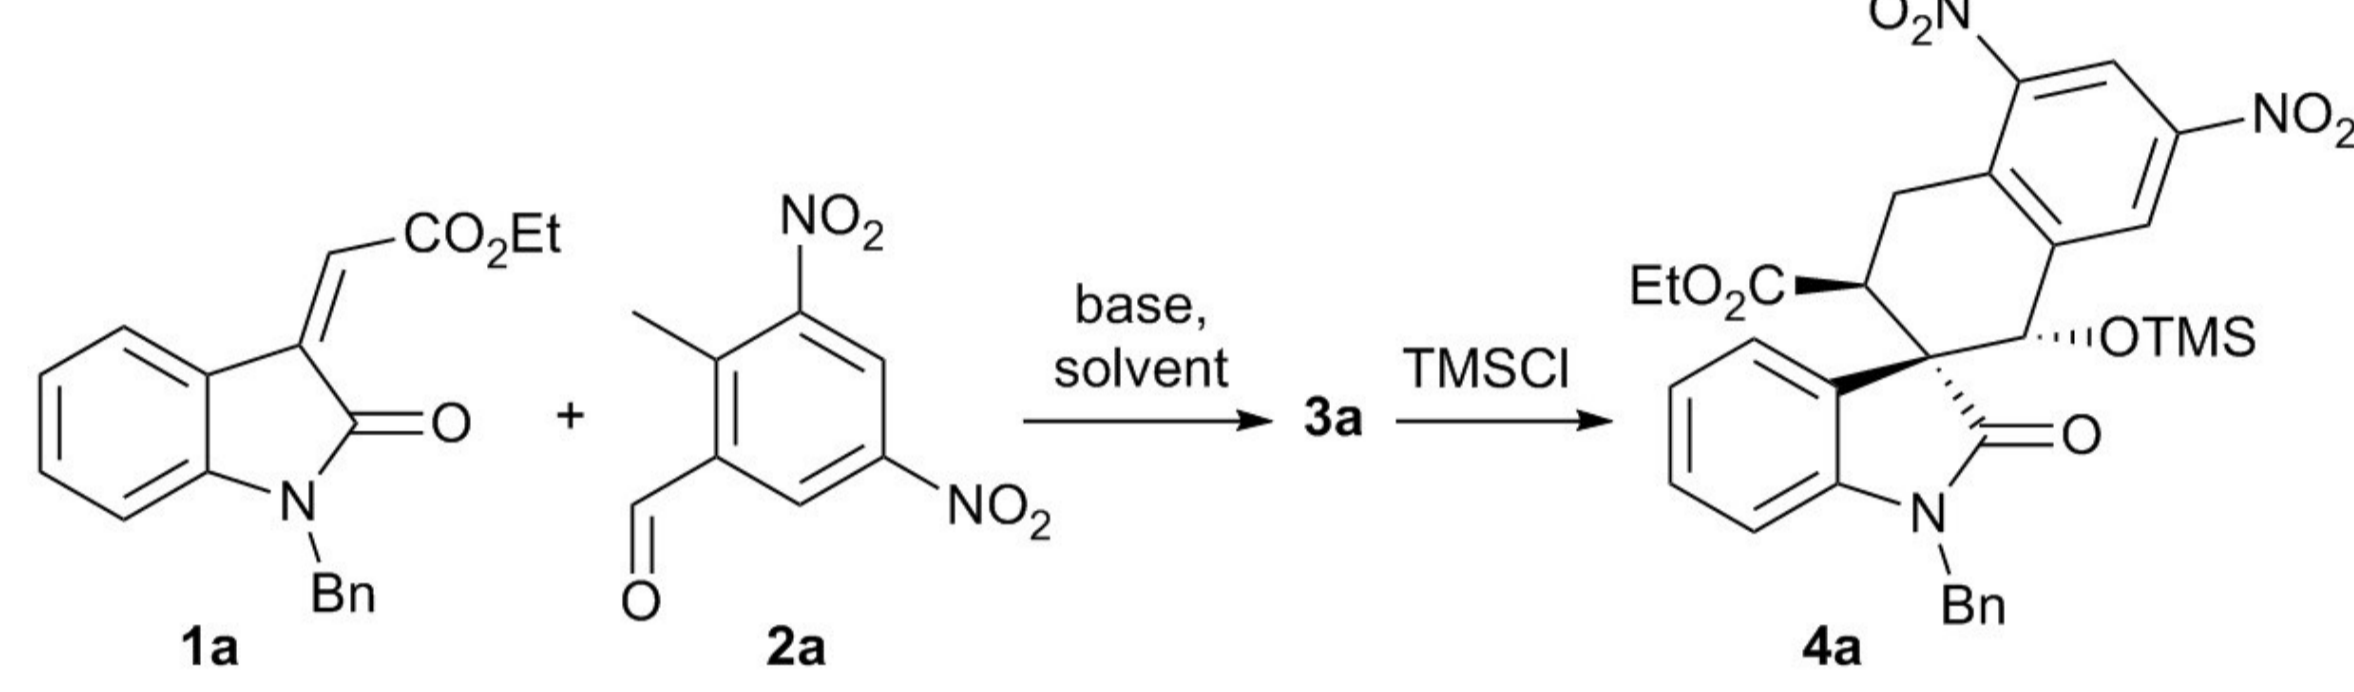

Table 2

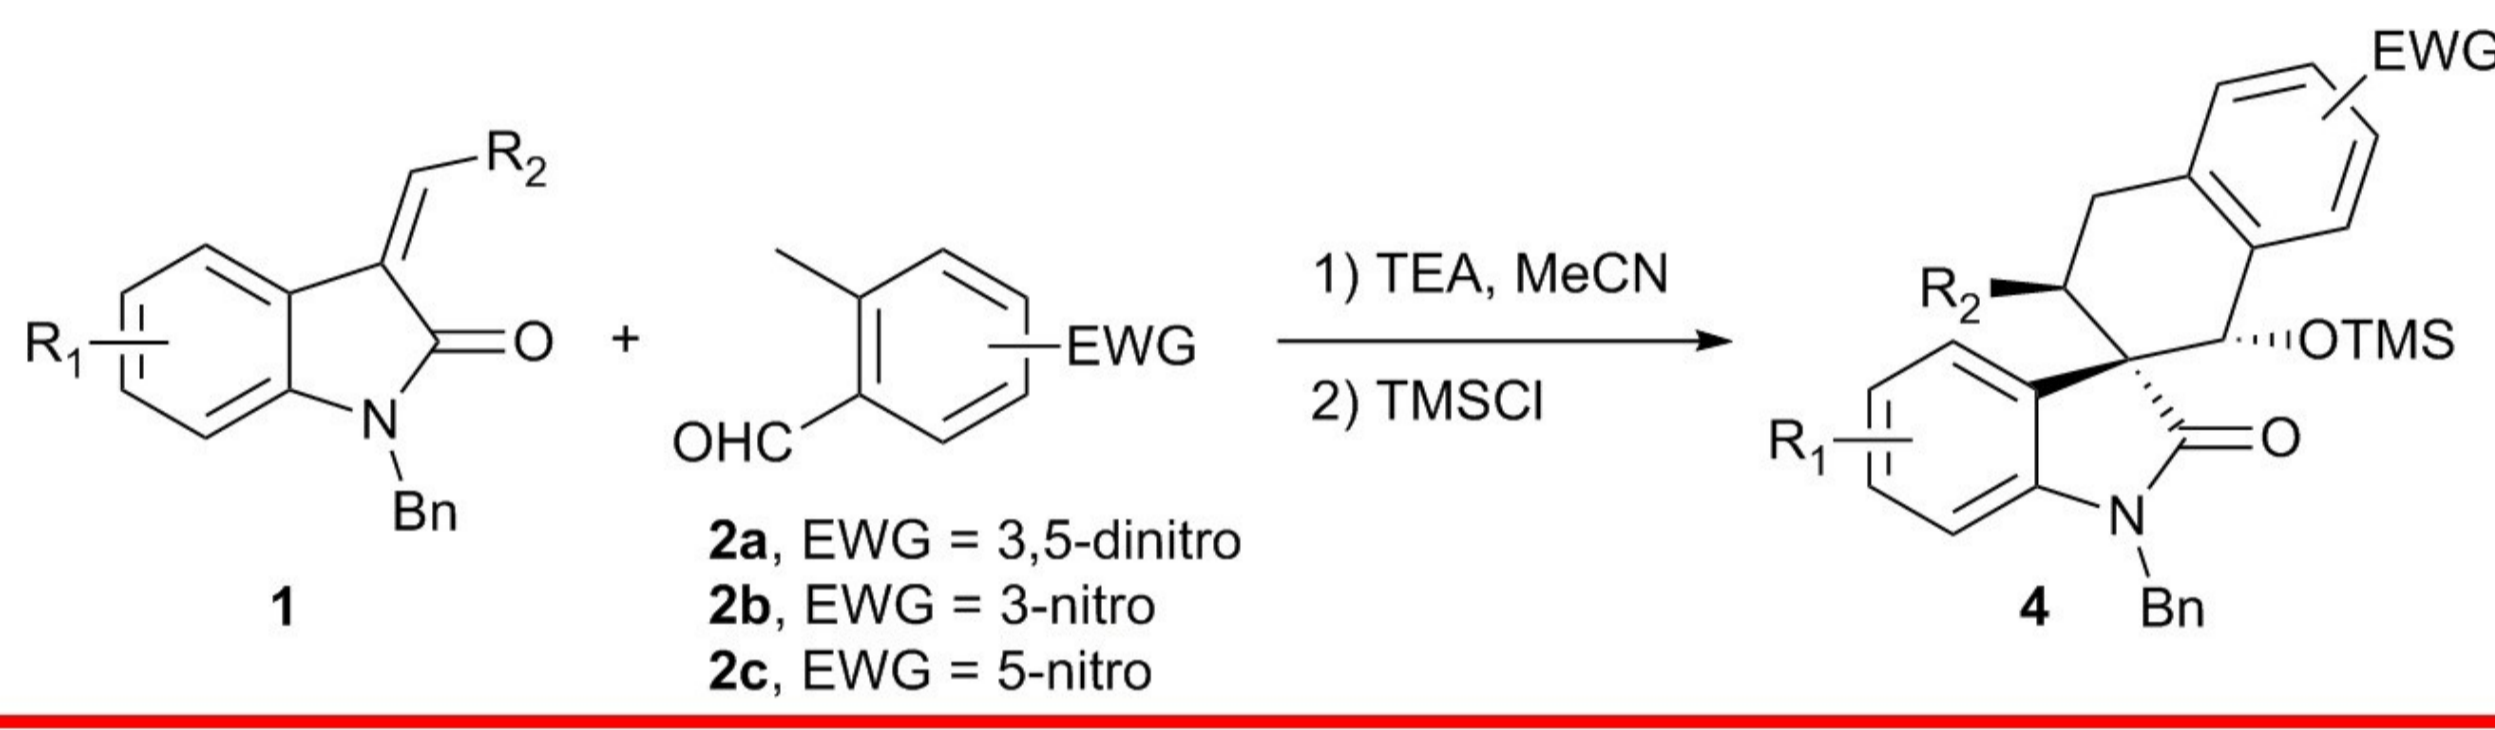

Table 3

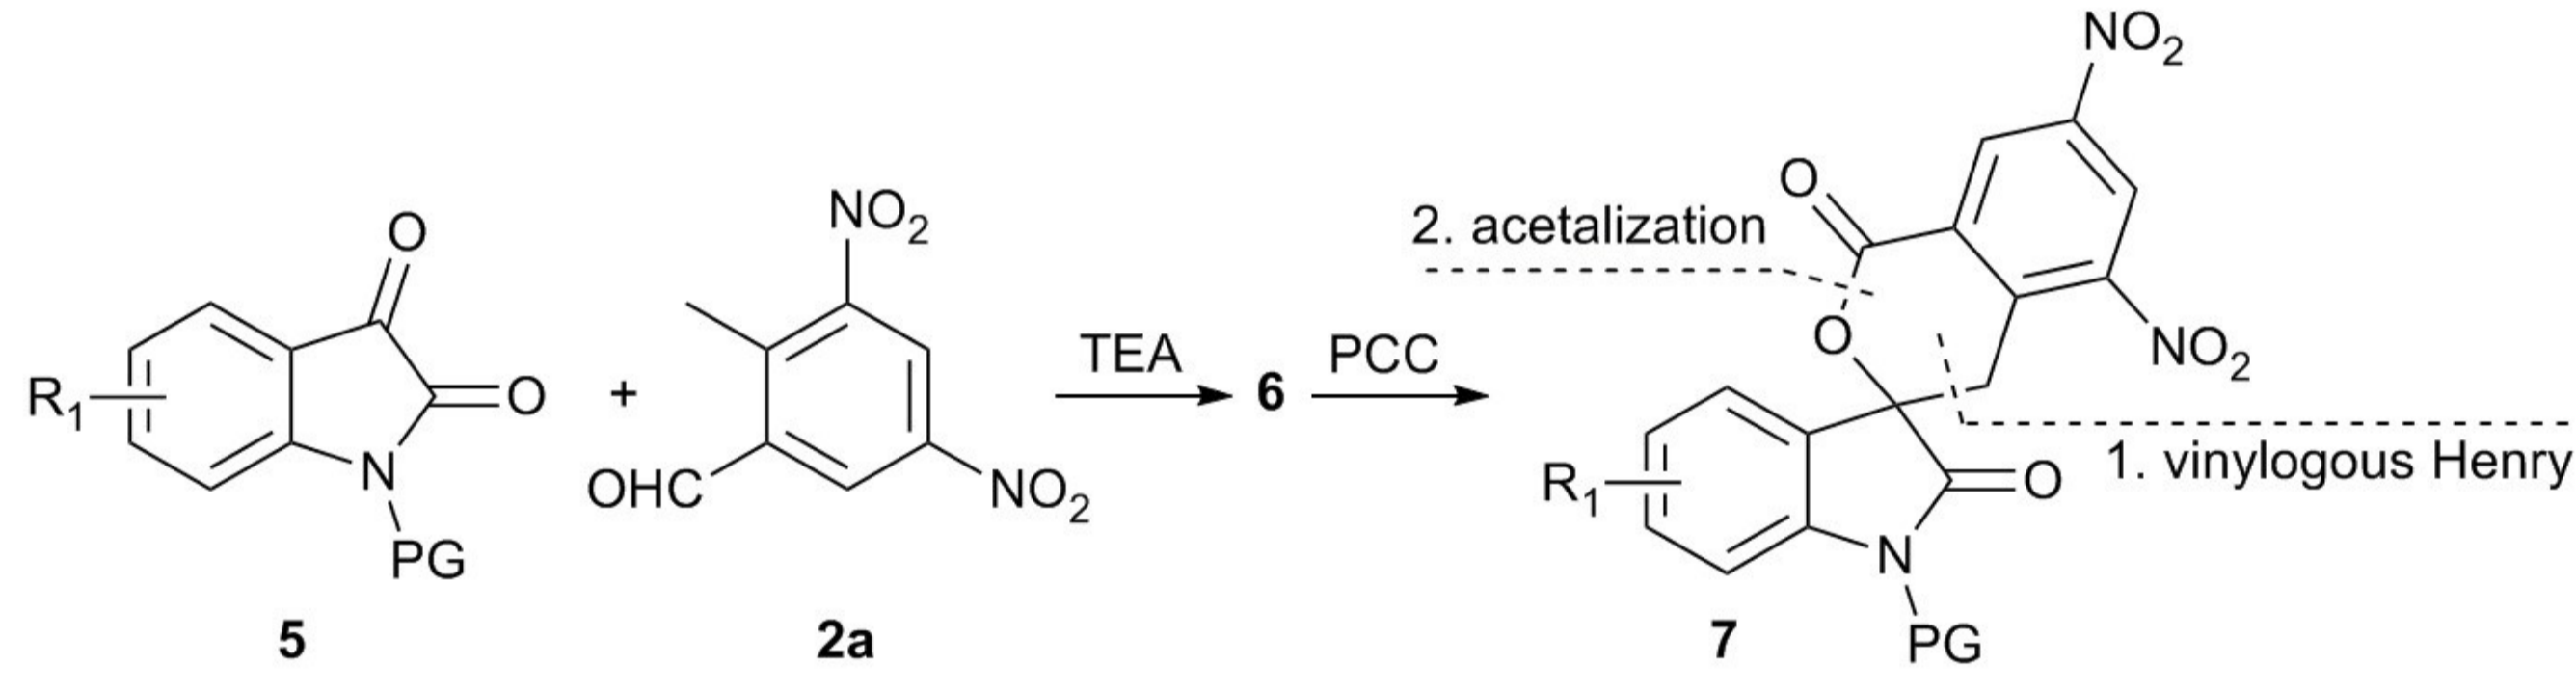

Scheme 2

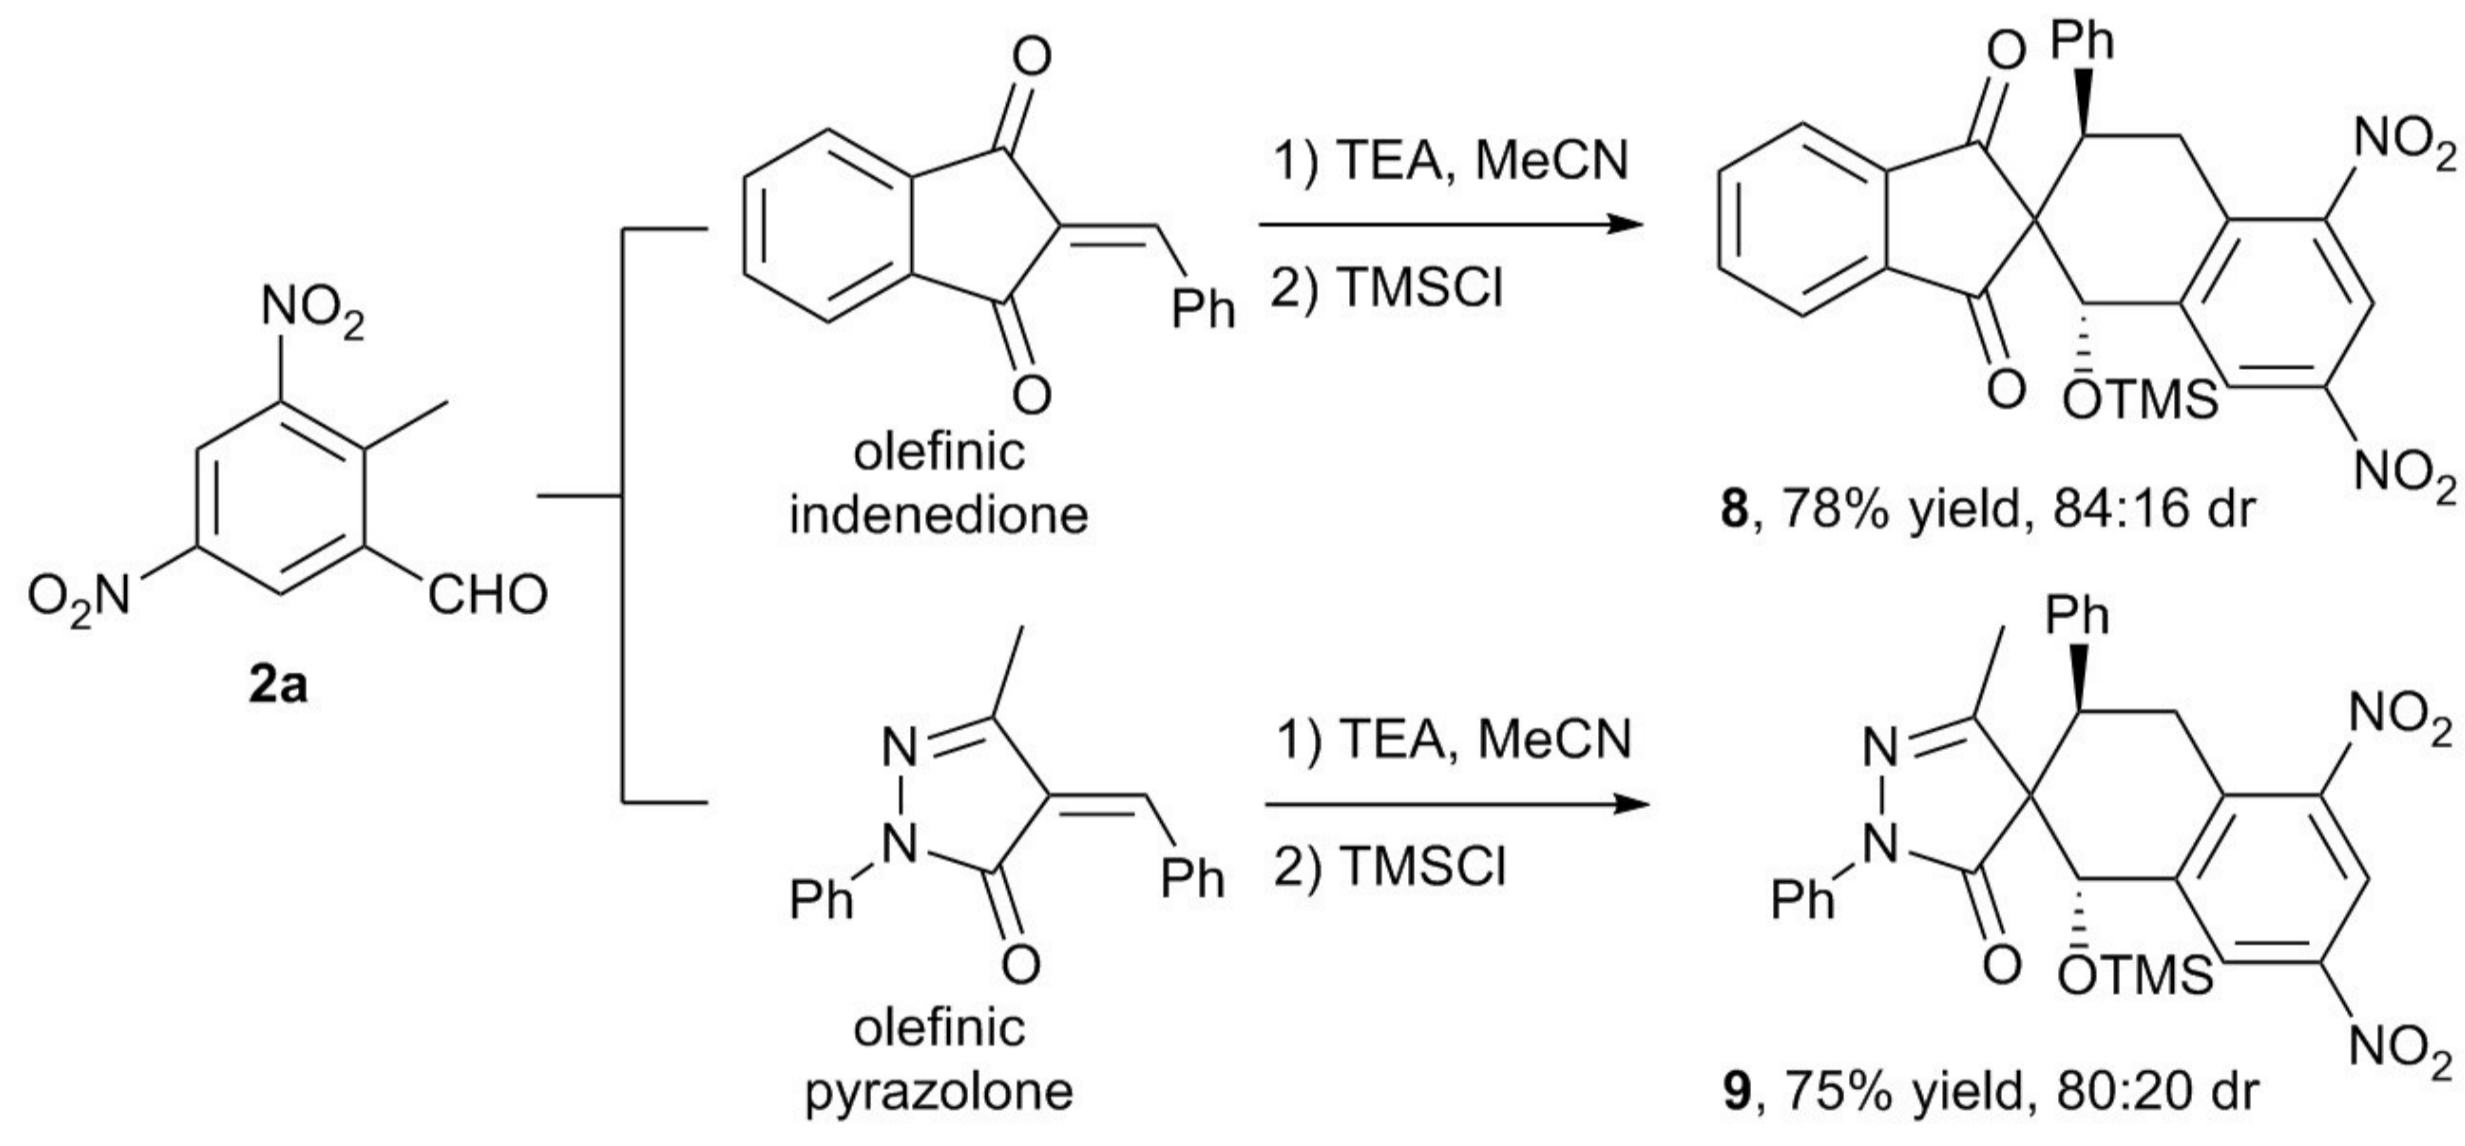

Scheme 3

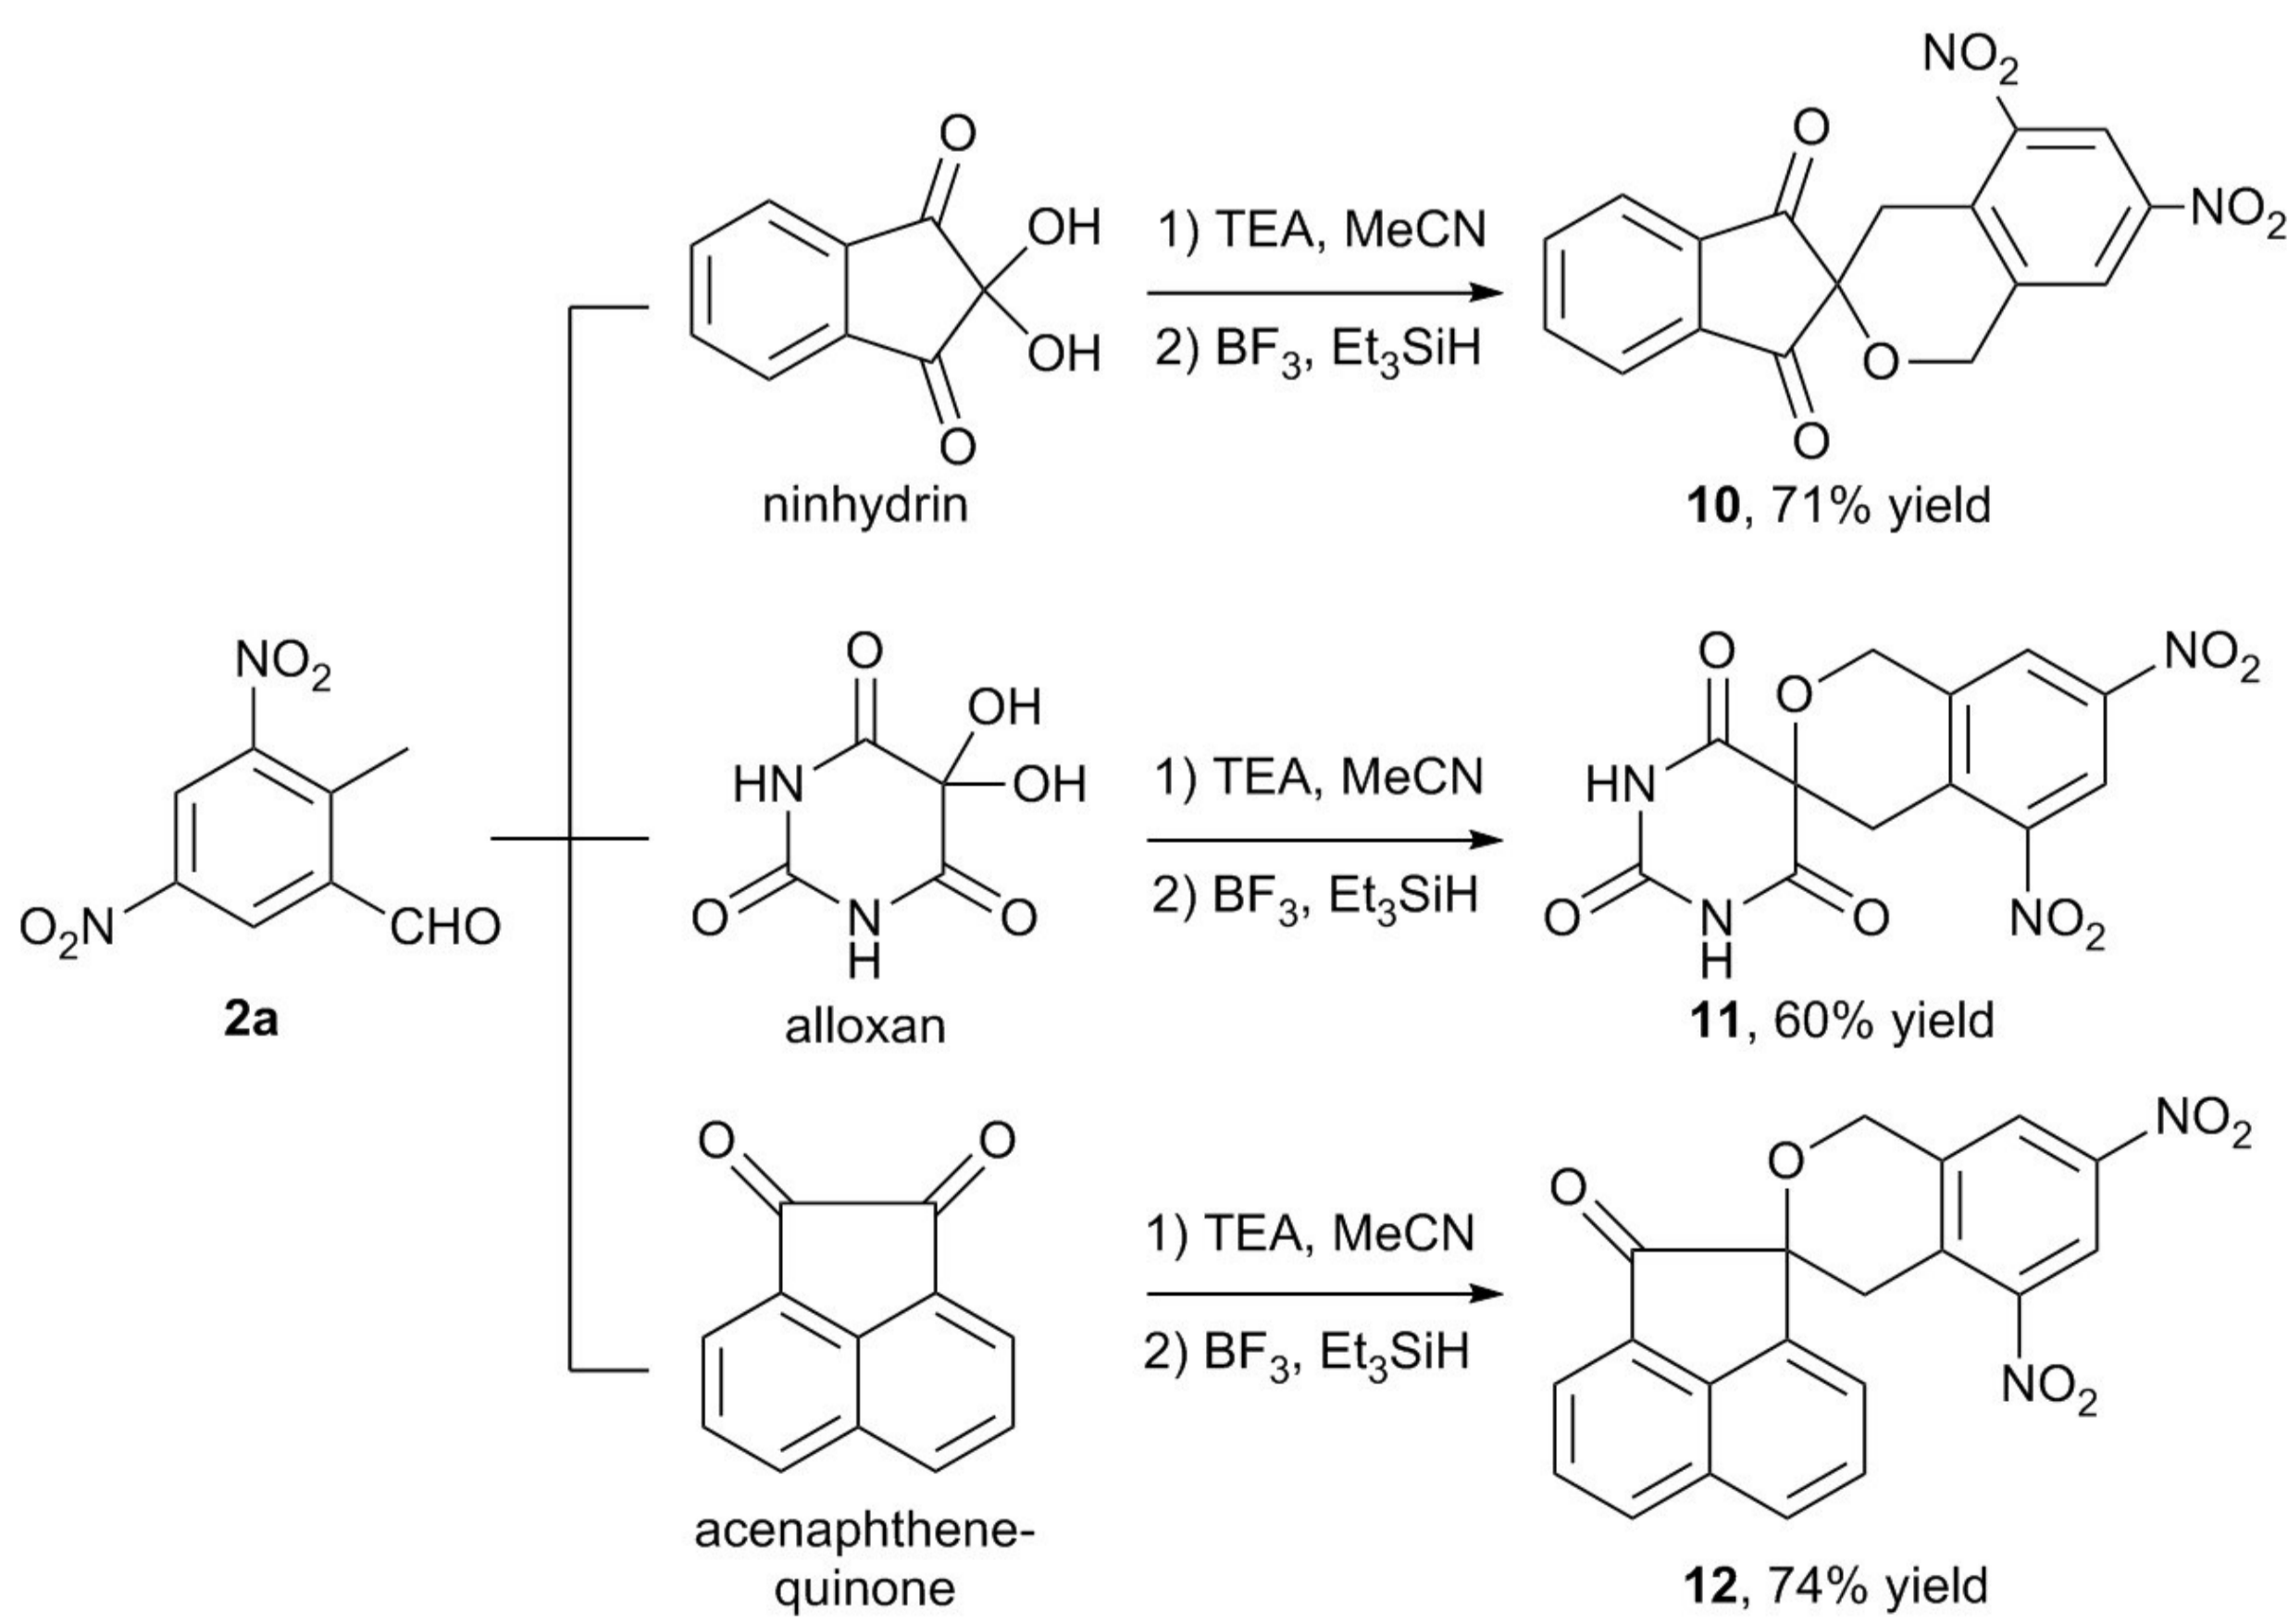

TOC

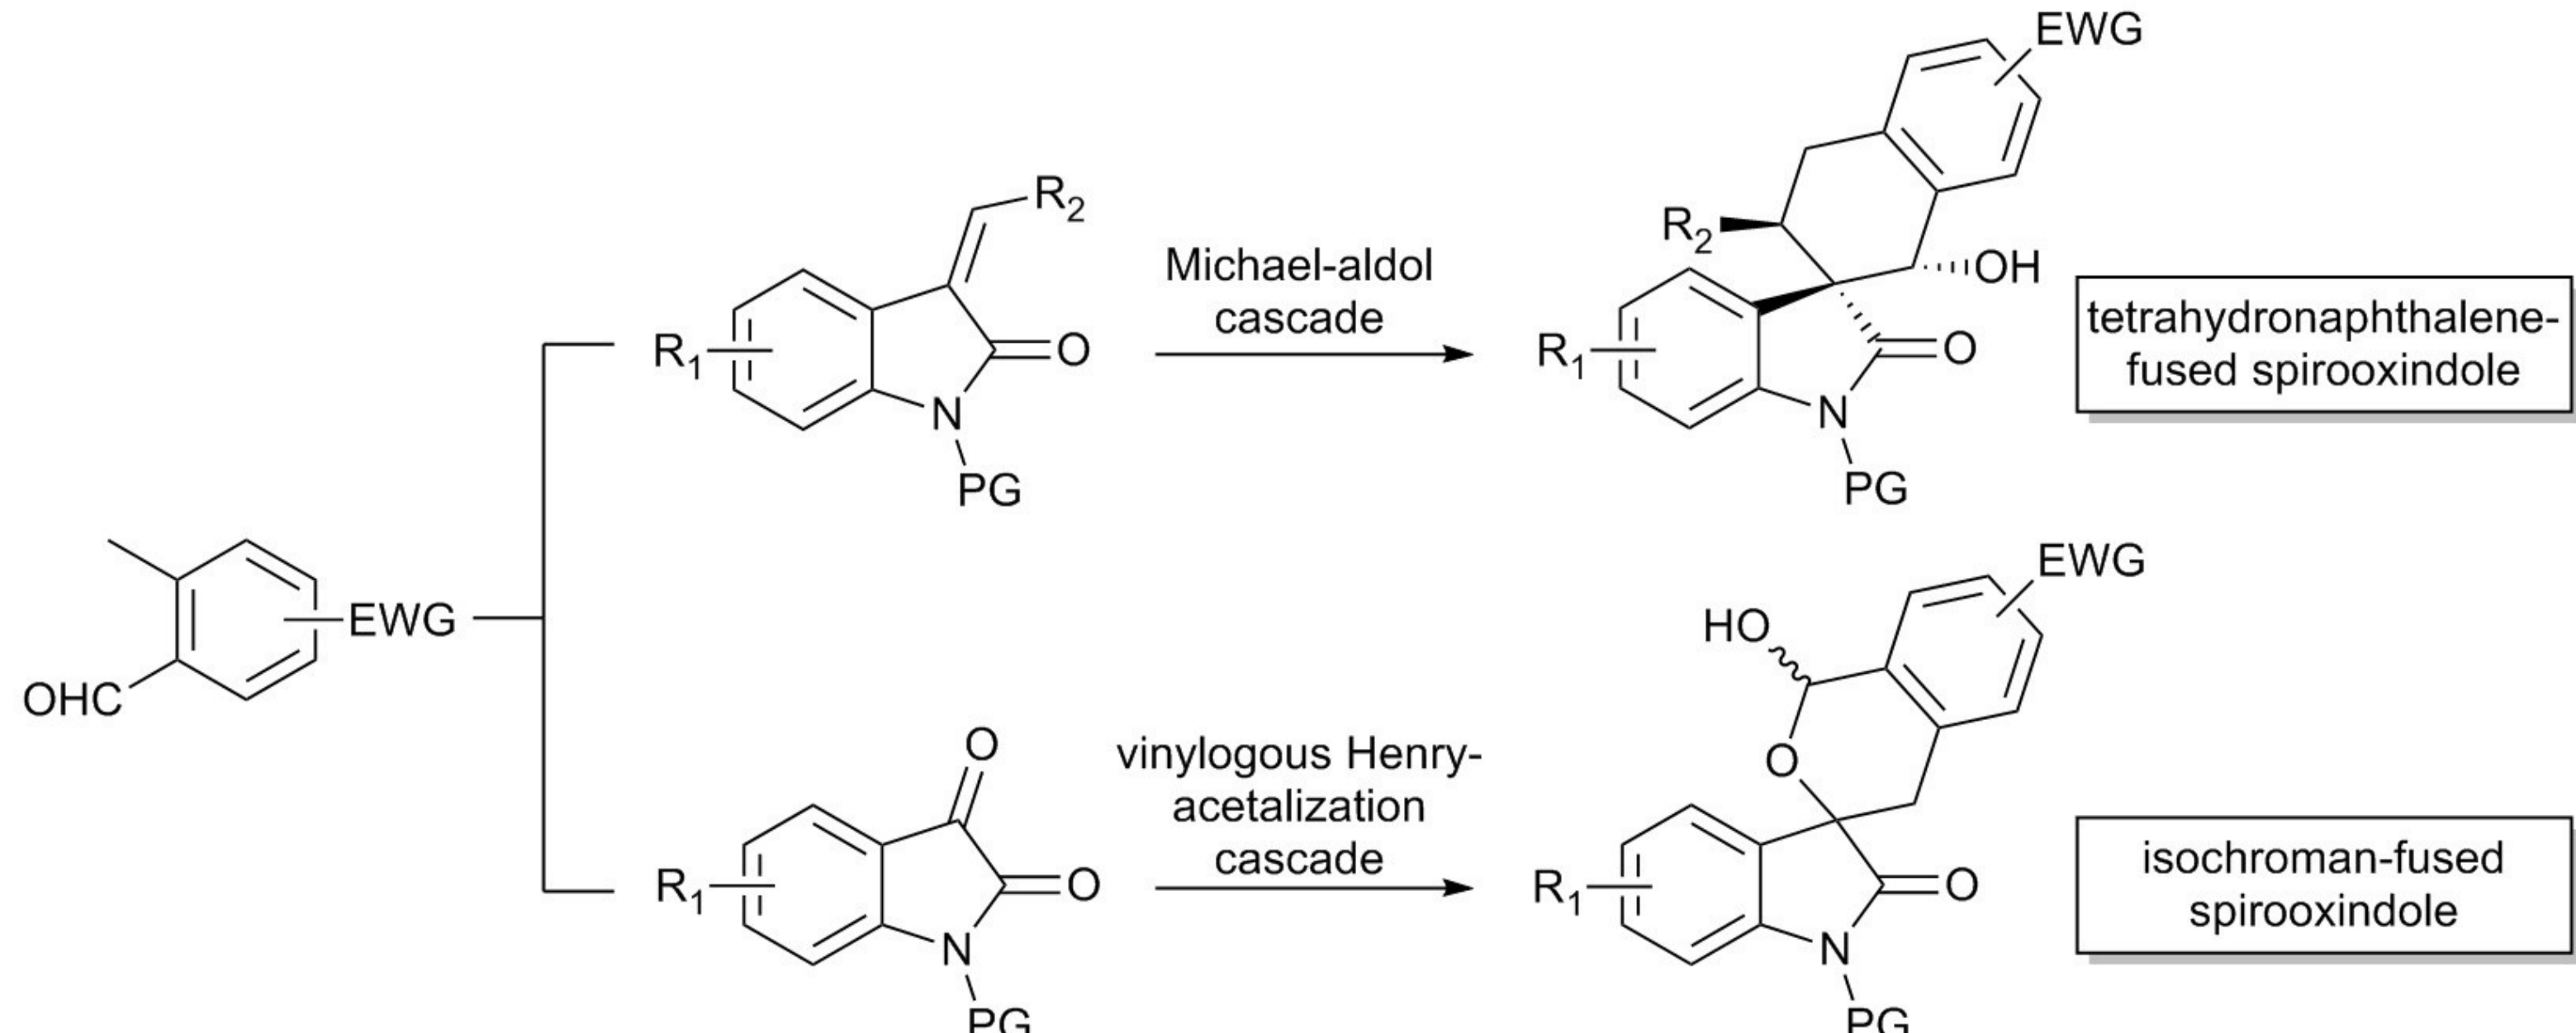

Supplement: c5ra15735h2.pdf [file c5ra15735h2.pdf]
